# Supplementary material
Source: publisher figshare collection journal article supplement (https://gsapubs.figshare.com/ndownloader/files/22739810)

GSA Data Repository Item # 8527

Title of article Florence-Niagara terrane: An early Proterozoic accretionary complex, Lake Superior region, U.S.A.

Author(s) D. K. Larue and W. L. Ueng

see Bulletin v. 96, p. 1179 - 1187

Contents 25 pages

Table and Figures

---

---

---

---

---

---

---

---

---

---

## REPOSITORY APPENDIX

## FIGURE CAPTIONS

1. Structural data plotted on lower hemisphere on Schmidt net. Circles - fold axes, bxcl intersections; dots - poles to bedding; triangles - elongation and alignment lineations; squares - poles to axial planes of minor folds and cleavage. Hollow symbols represent first phase or dominant lineations; infilled symbols represent younger or sub-dominant lineations (see text). Lined circles in Packet 7 shows bedding/cross-bedding intersection lineation.
2. Plot of bed thickness ratio, relative to hinge thickness, against dip of bedding. A. Packet 1 folds ( $n = 12$ ). B. Packet 2 folds ( $n = 29$ ).
3. Apical angle plotted as a function of rake of fold axis in axial plane. Packet 8.
4. Metamorphism of western Florence-Niagara terrane. Redrawn from Dutton (1970).

TABLE 1. Summary of Fault Packages

| Pac-<br>ket | Definition of<br>Boundaries                                                                                 | Lithology                                                                                    | General<br>Structure                                                                                                                                                                       | Orientation strain<br>axes                                                                                                                    | Deformation<br>History                                                                                                    |
|-------------|-------------------------------------------------------------------------------------------------------------|----------------------------------------------------------------------------------------------|--------------------------------------------------------------------------------------------------------------------------------------------------------------------------------------------|-----------------------------------------------------------------------------------------------------------------------------------------------|---------------------------------------------------------------------------------------------------------------------------|
| 1           | N contact: truncate stratigraphy; S contact: local truncations of stratigraphy, change in structural style. | dolomite (Chocoday Group); quartzite, iron formation (Menominee Group); both shelf deposits. | S-facing homocline with some major folds; axial planes strike WNW, dip vertically, fold axes plunge shallowly.                                                                             | XY plane strikes WNW, dips steeply. X either subhorizontal or subvertical.                                                                    | SSW-shortening; superposed heterogenous strains cause two extension directions?                                           |
| 2           | S contact: change in stratigraphy.                                                                          | deep water (slope basinal) mudstones (now slates) and sandstones: Baraga Group.              | mostly S-facing homocline with some major folds; axial planes strike WNW dip vertically, fold axes girdled in mean axial plane.                                                            | XY plane strikes WNW dips steeply. X plunges steeply W.                                                                                       | SSW-shortening. Rotation of fold axes toward direction of extension (model of Sanderson, 1973) accompanying great strain. |
| 3           | S contact: abrupt change in sedimentologic facies and structure.                                            | shallow water quartzites of Baraga Group.                                                    | SW-facing homocline. Fold axes and bedding cleavage lineations plunge down the WNW striking foliation.                                                                                     | XY plane strikes WNW, dips steeply. X plunges steeply W.                                                                                      | SSW-shortening; origin of reclined folds unclear; due to non-coaxial strain history?                                      |
| 4           | S contact: abrupt change in tectono-stratigraphy.                                                           | deep water mudstones (now slates) and sandstones: Baraga Group.                              | SW-facing homocline(?), top indicators rare). Folds uncommon, foliation strikes NW, dips steeply south. Cut by right lateral strike-slip faults that have associated folds in fault walls. | XY plane strikes NW, dips steeply SW. X plunges down-dip. Axes of strain during strike-slip faulting: XY, WNW, subvertical, X, subhorizontal. | SW shortening followed by strike-slip faulting.                                                                           |

TABLE 1. (cont'd)

| Pac-<br>ket | Definition of<br>Boundaries                                                    | Lithology                                                                                  | General<br>Structure                                                                                                                                                                        | Orientation strain<br>Axes                                                                    | Deformation<br>History                                                                                                                                          |
|-------------|--------------------------------------------------------------------------------|--------------------------------------------------------------------------------------------|---------------------------------------------------------------------------------------------------------------------------------------------------------------------------------------------|-----------------------------------------------------------------------------------------------|-----------------------------------------------------------------------------------------------------------------------------------------------------------------|
| 5           | N contact: truncation stratigraphy; S contact, change in structural style.     | dolomite (Chocoday Group); quartzite and iron formation (Menominee Group); shelf deposits. | S-facing homocline with a few major folds. Axial planes and foliations strike WNW, dip steeply. Fold axes plunge shallowly.                                                                 | XY strike WNW, dips steeply.                                                                  | SSW shortening.                                                                                                                                                 |
| 6           | S contact: change in stratigraphy.                                             | poorly exposed deep-water facies (Baraga Group).                                           | poorly exposed; foliation strikes WNW, dips steeply. Some fold axes reclined.                                                                                                               | poorly constrained; XY strikes WNW, dips steeply.                                             | poorly constrained SSW shortening.                                                                                                                              |
| 7           | N contact: poorly constrained; S contact: abrupt change in sedimentary facies. | shallow water quartzites (Baraga Group).                                                   | SW-facing homocline with local regional warps. Foliation strikes NW, fold axes plunge, down-dip.                                                                                            | XY strikes NW, X plunges steeply.                                                             | SSW shortening; origin of steeply plunging fold axes due to non-coaxial strain(?)                                                                               |
| 7A          | Both contacts: based on pinch-out of unit.                                     | shallow water quartzites (Baraga Group).                                                   | poorly understood; foliations strike WNW and dip steeply; bedding-cleavage intersections are girdled.                                                                                       | XY strikes WNW.                                                                               | SSW shortening; deformation is poorly constrained; rotation of bedding cleavage intersections toward X with progressive strain(?).                              |
| 8           | Both contacts: truncation of stratigraphy.                                     | shelfal to basinal volcanics (Baraga Group), iron formation and slate (Paint River Group). | poorly understood; major fold with SE closing hinge? Two phases of deformation: first, axial planes strike W, steep dips, girdled fold axes; second, N-S striking axial planes, steep dips. | first deformation: XY strikes W, dips steeply second deformation: XY strikes N, dips steeply. | first deformation S-shortening accompanied by great strain(?) such that fold axes girdled in mean axial plane; second deformation folds formed by W-shortening. |

Figure 1.

### LEGEND

- POLE TO BEDDING
- F1 FOLD AXIS, BED x CLEAVAGE  
INTERSECTION
- ⬡ STRIATIONS
- POLE TO AXIAL PLANE AND CLEAVAGE OF F1
- POLE TO AXIAL PLANE AND CLEAVAGE OF F2
- △ DOMINANT ELONGATION LINEATION
- ▲ SUBDOMINANT ELONGATION LINEATION
- ⊖ BED CROSS-BED INTERSECTION

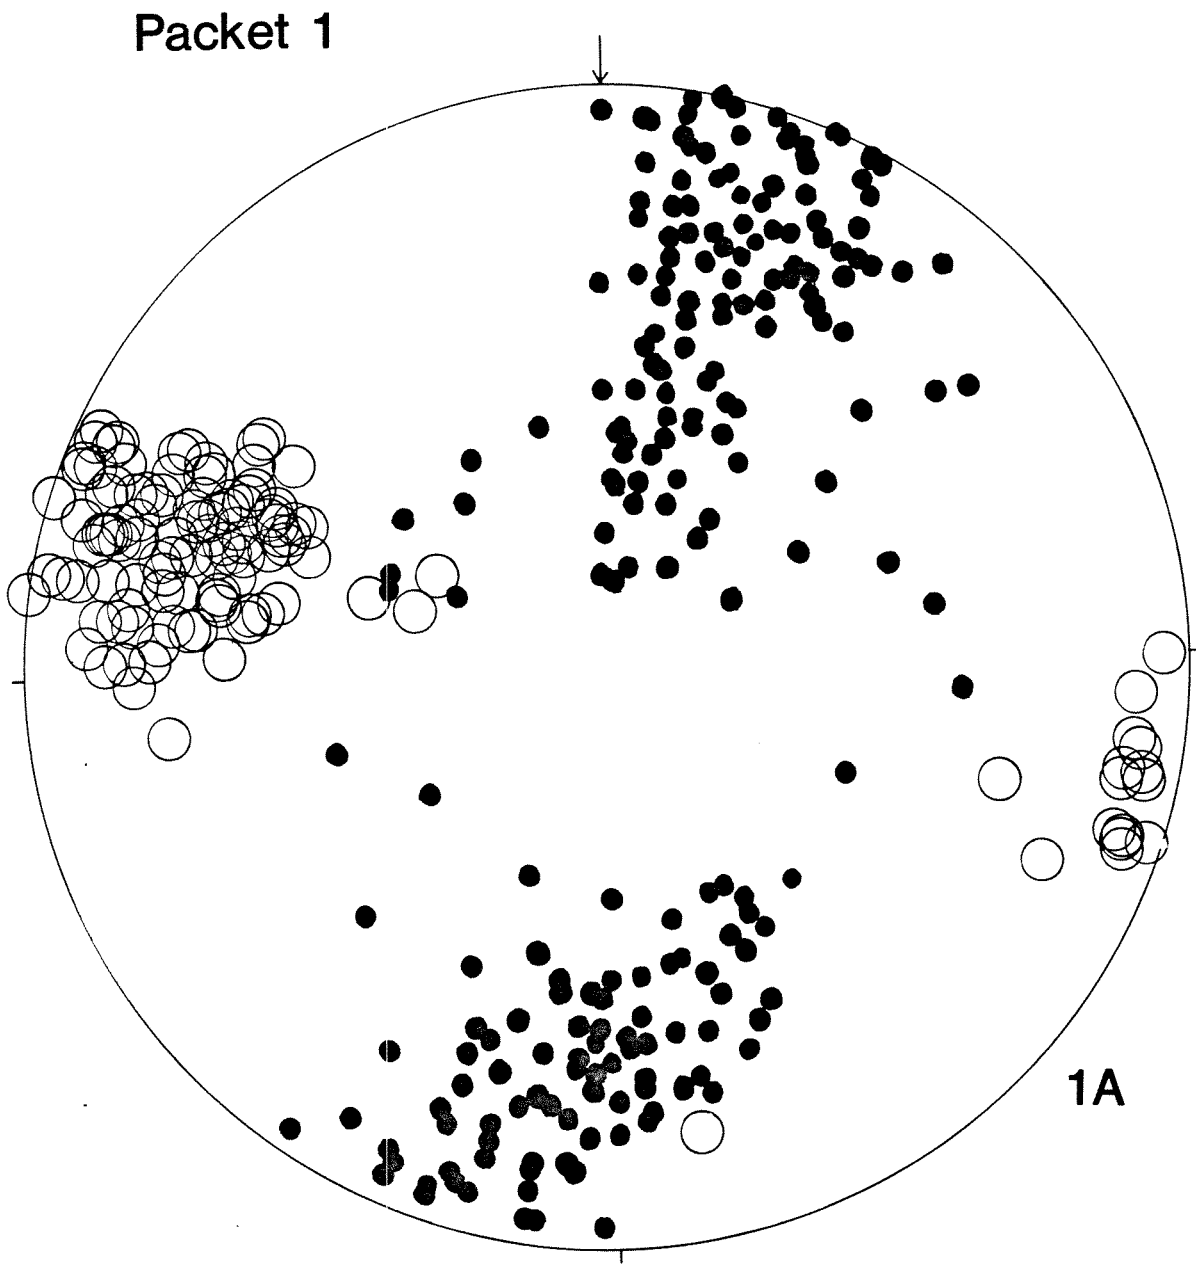

Packet 1

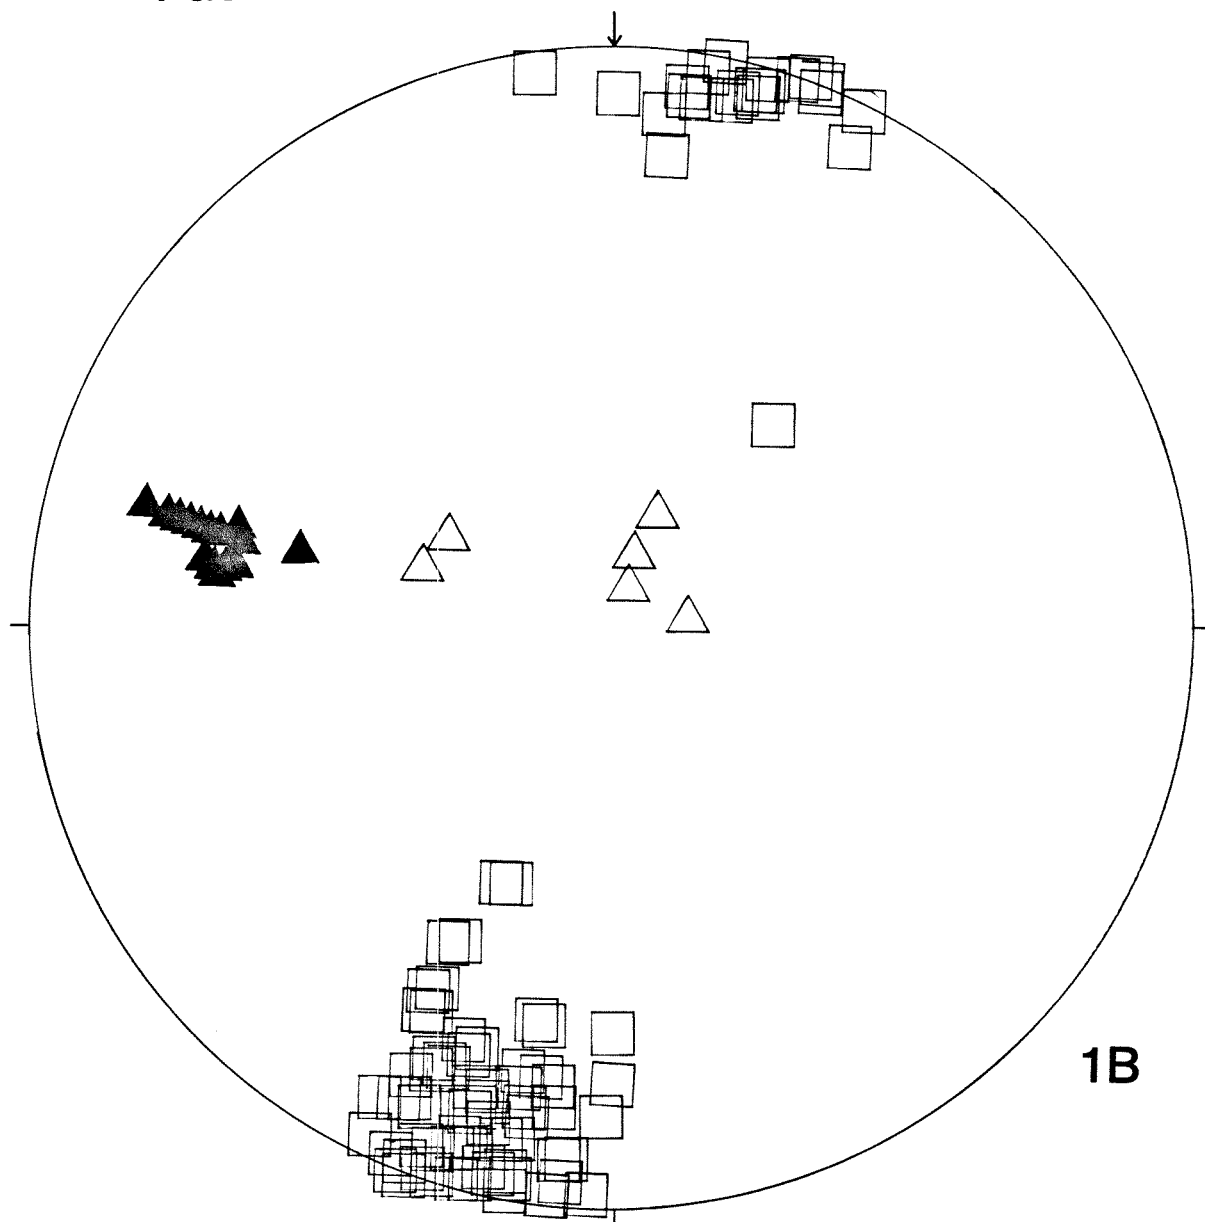

Packet 2

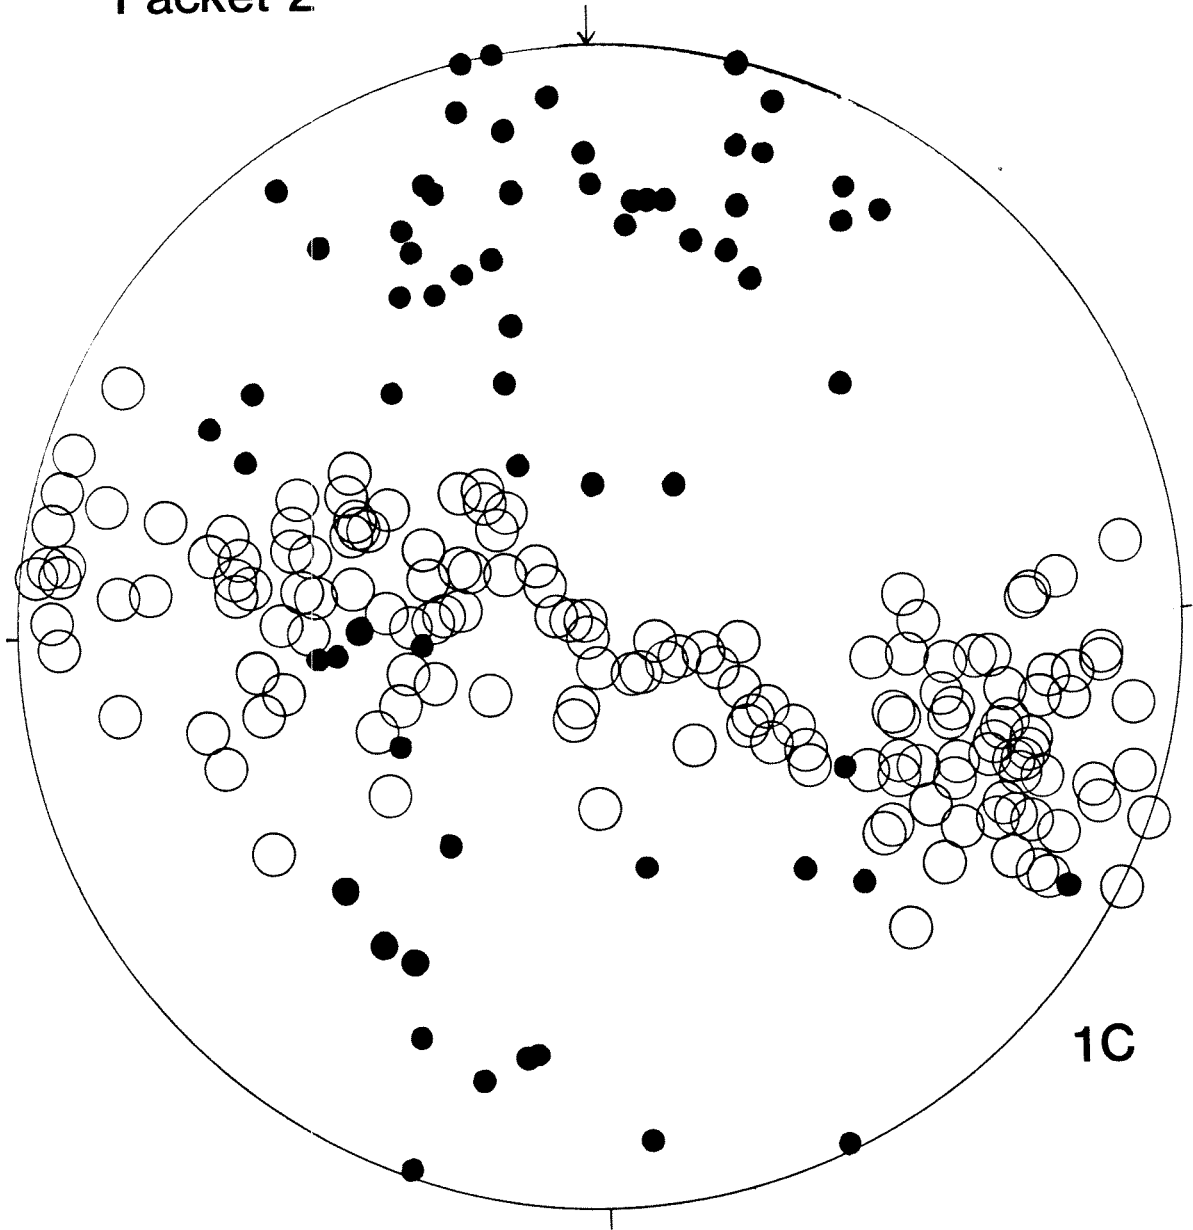

Packet 2

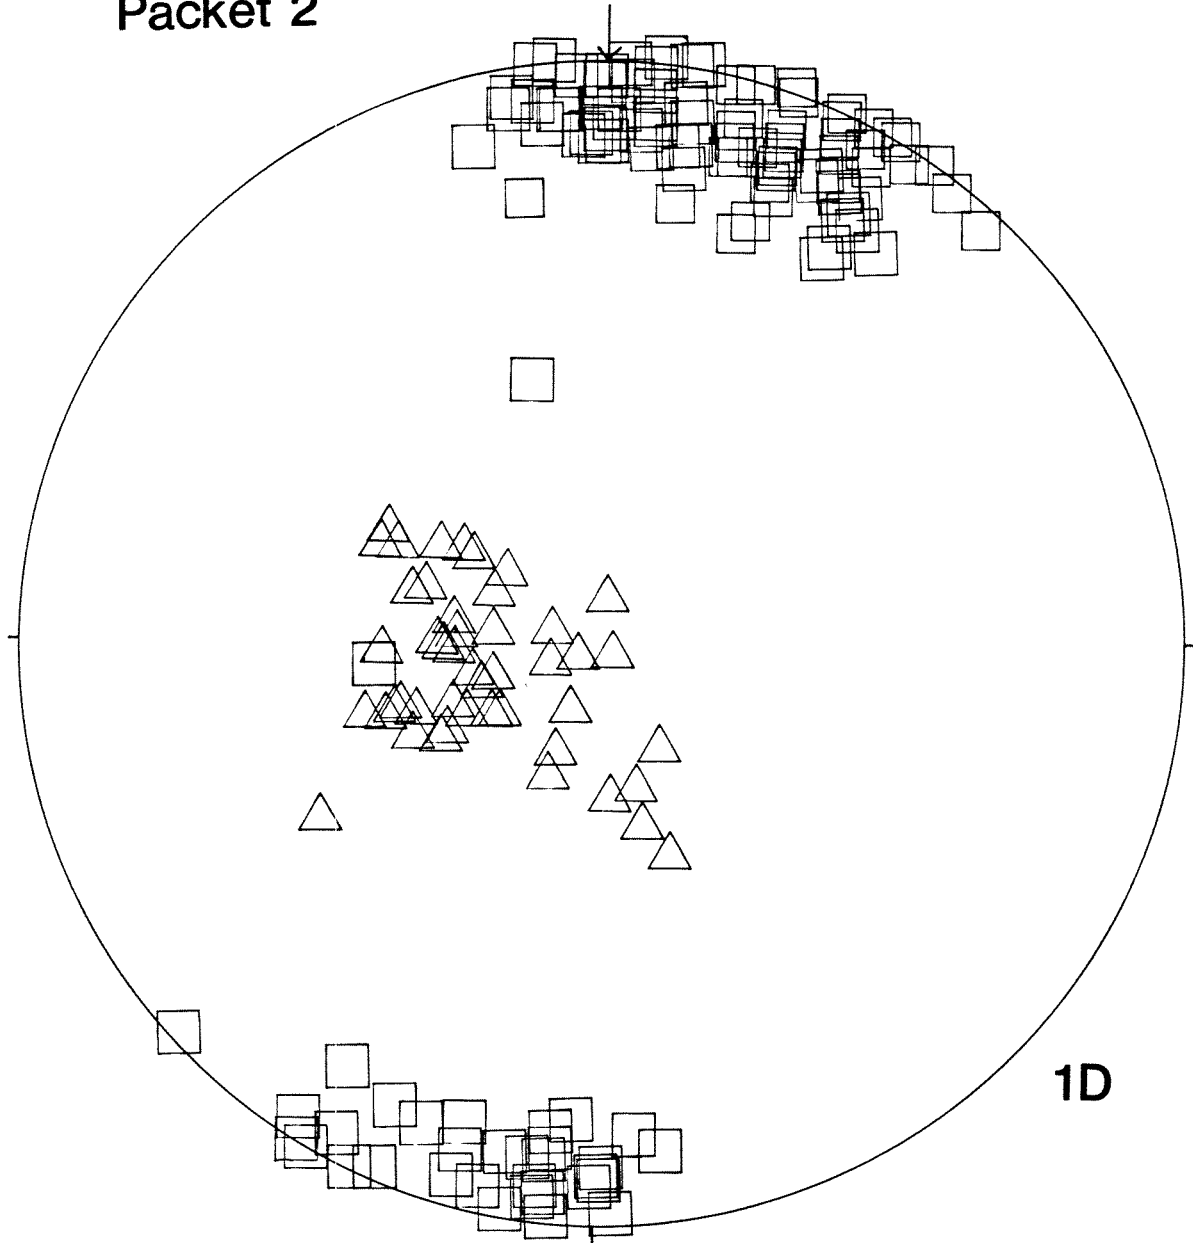



Packet 3

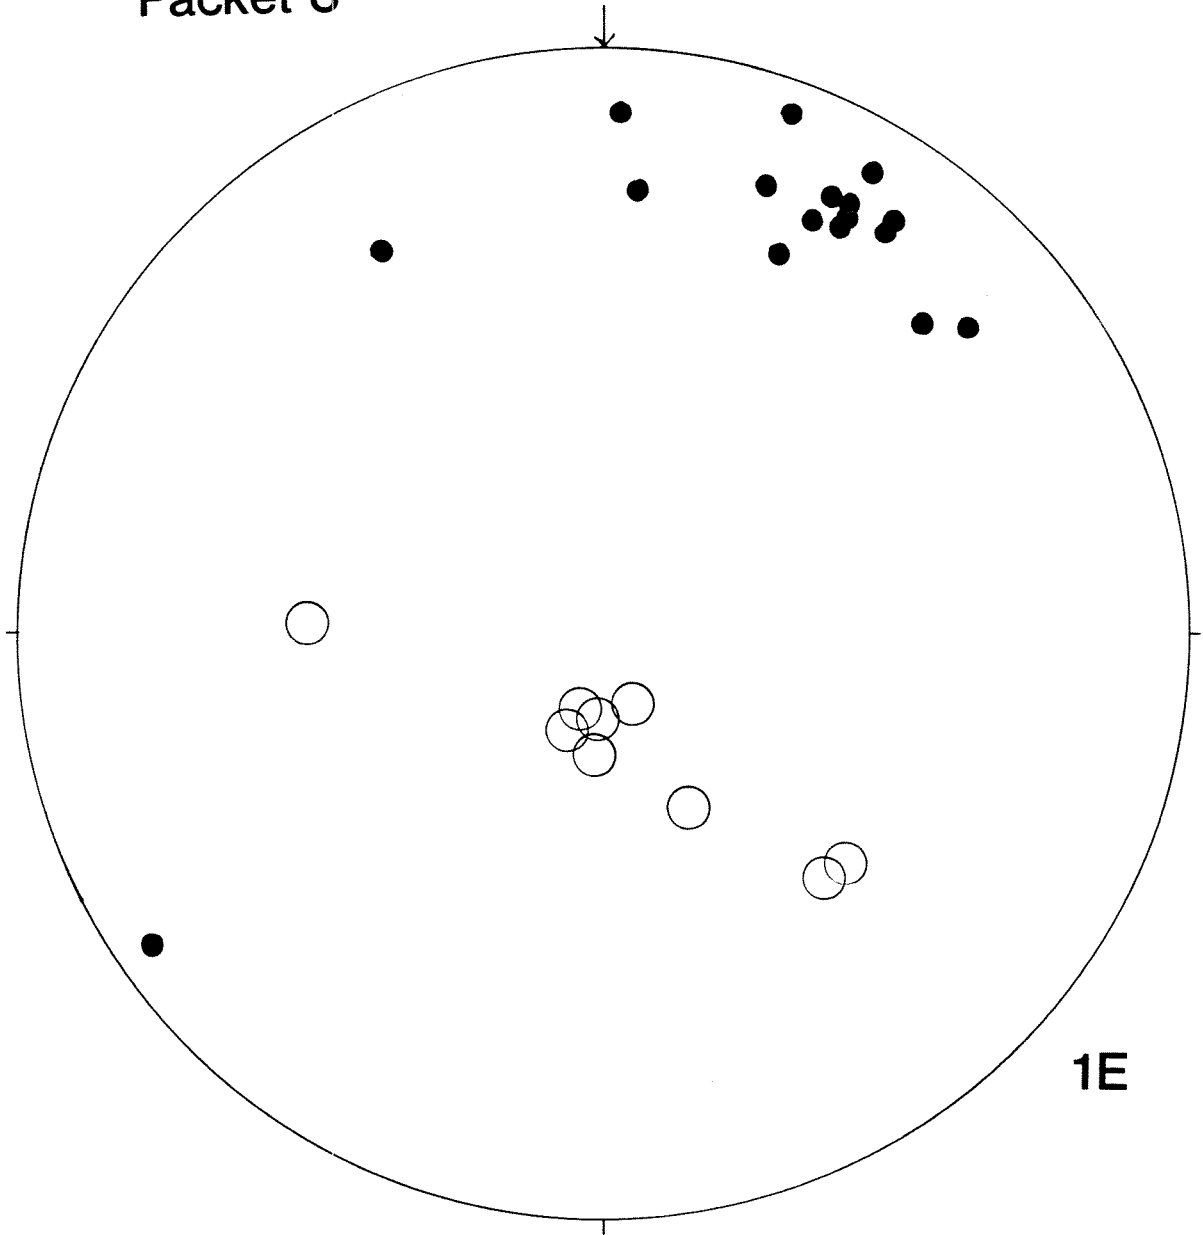

Packet 3

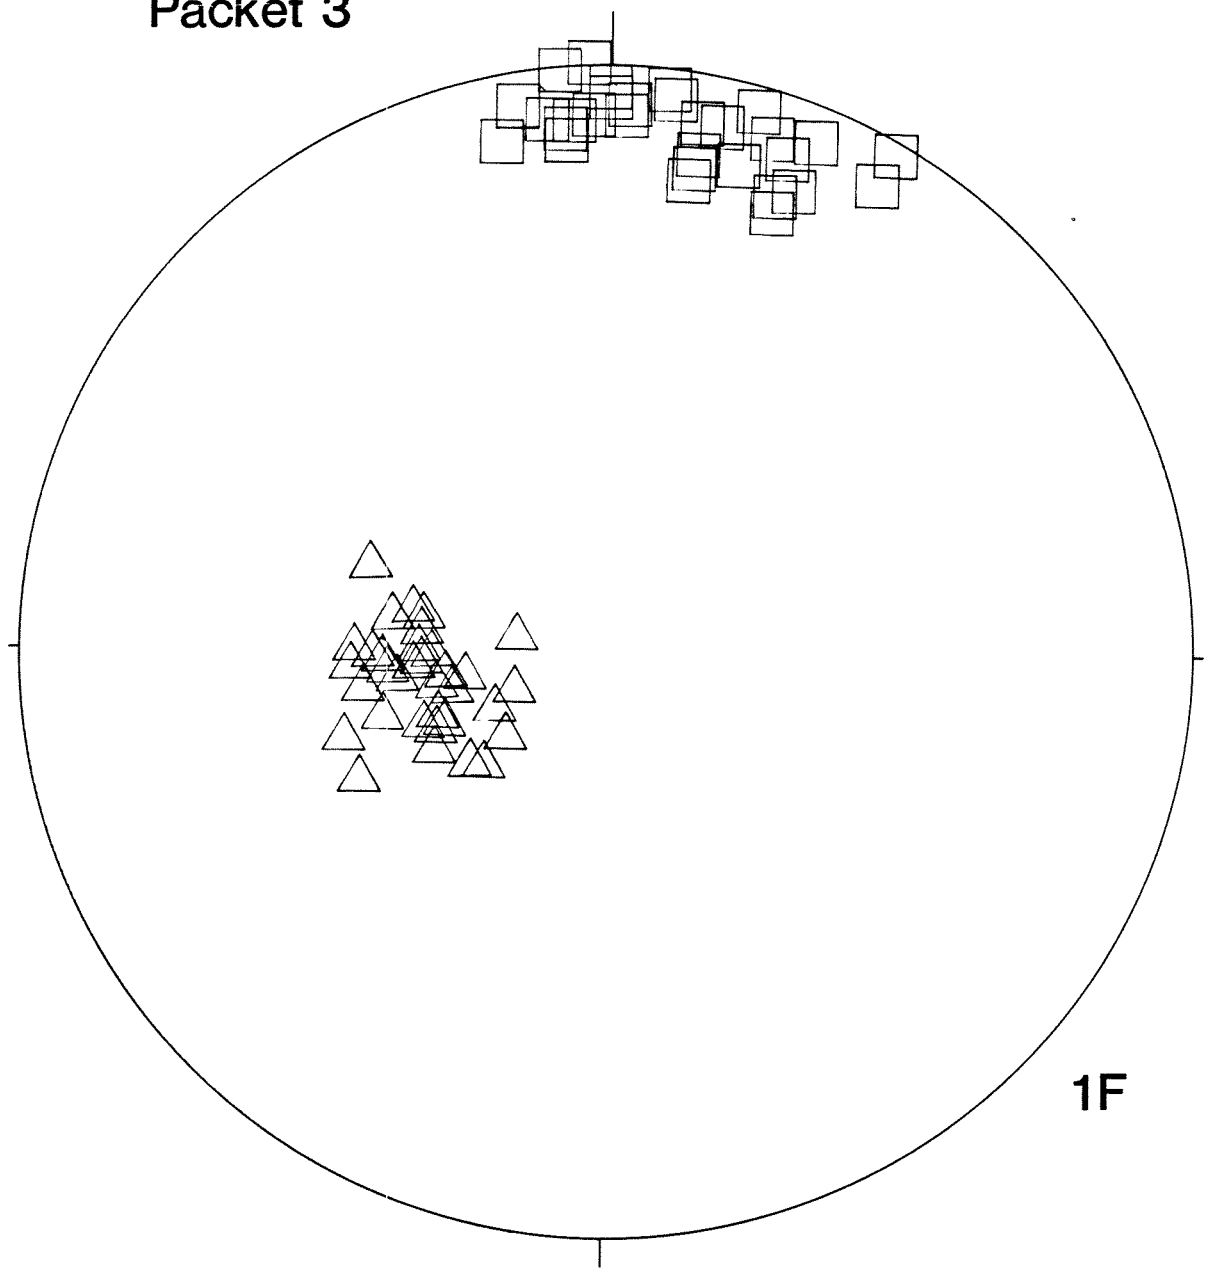

1F

Packet 4

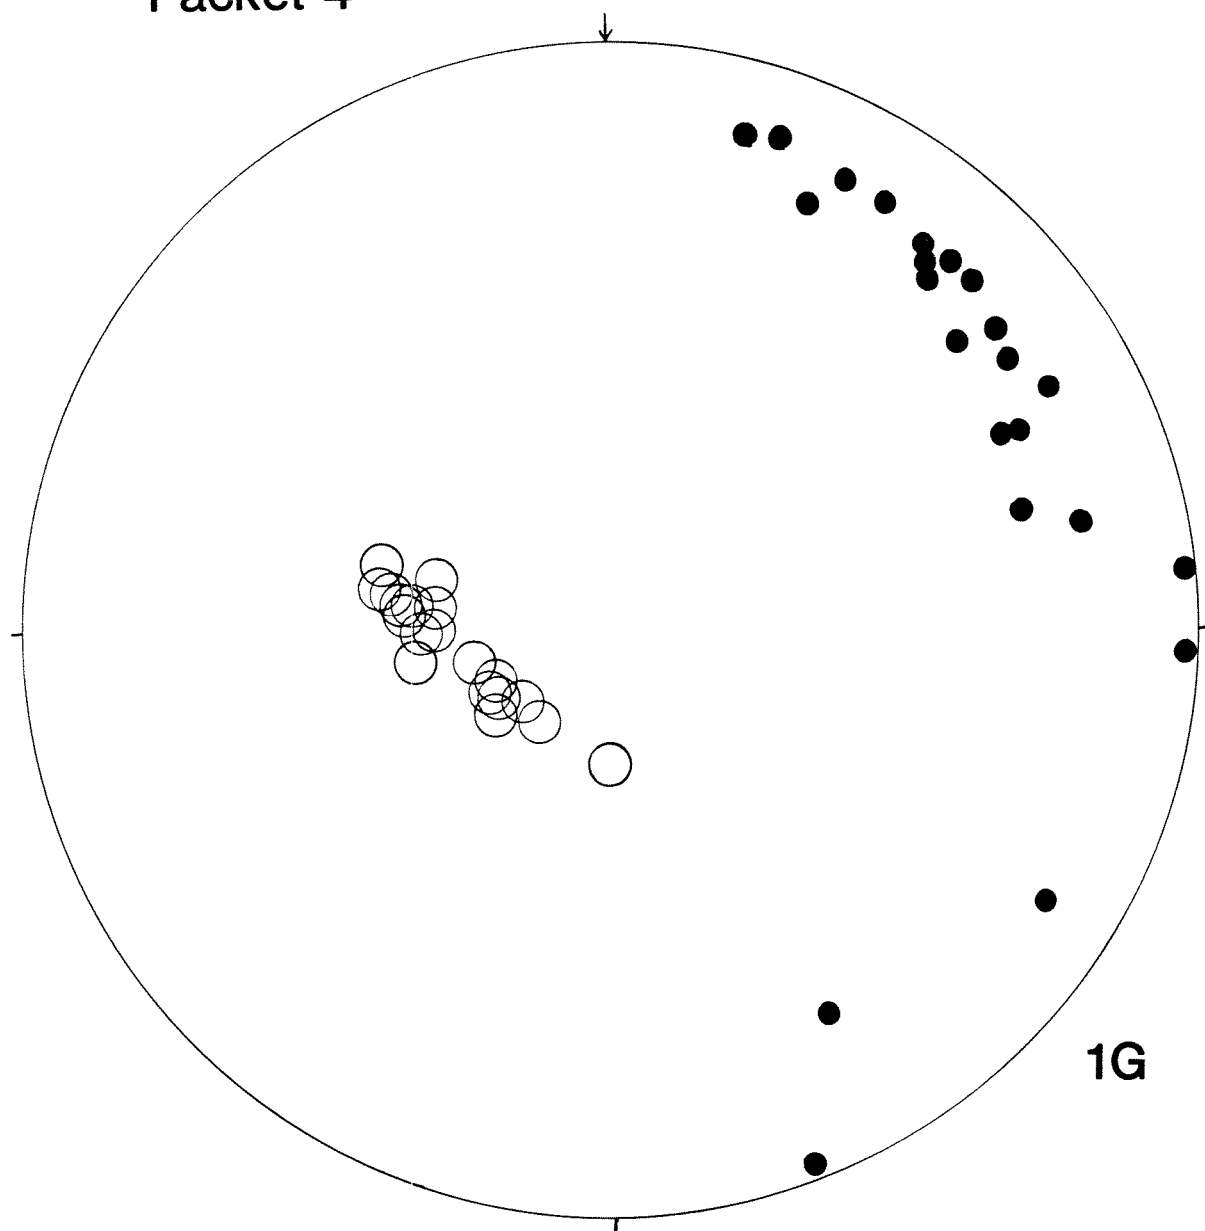

## Packet 4

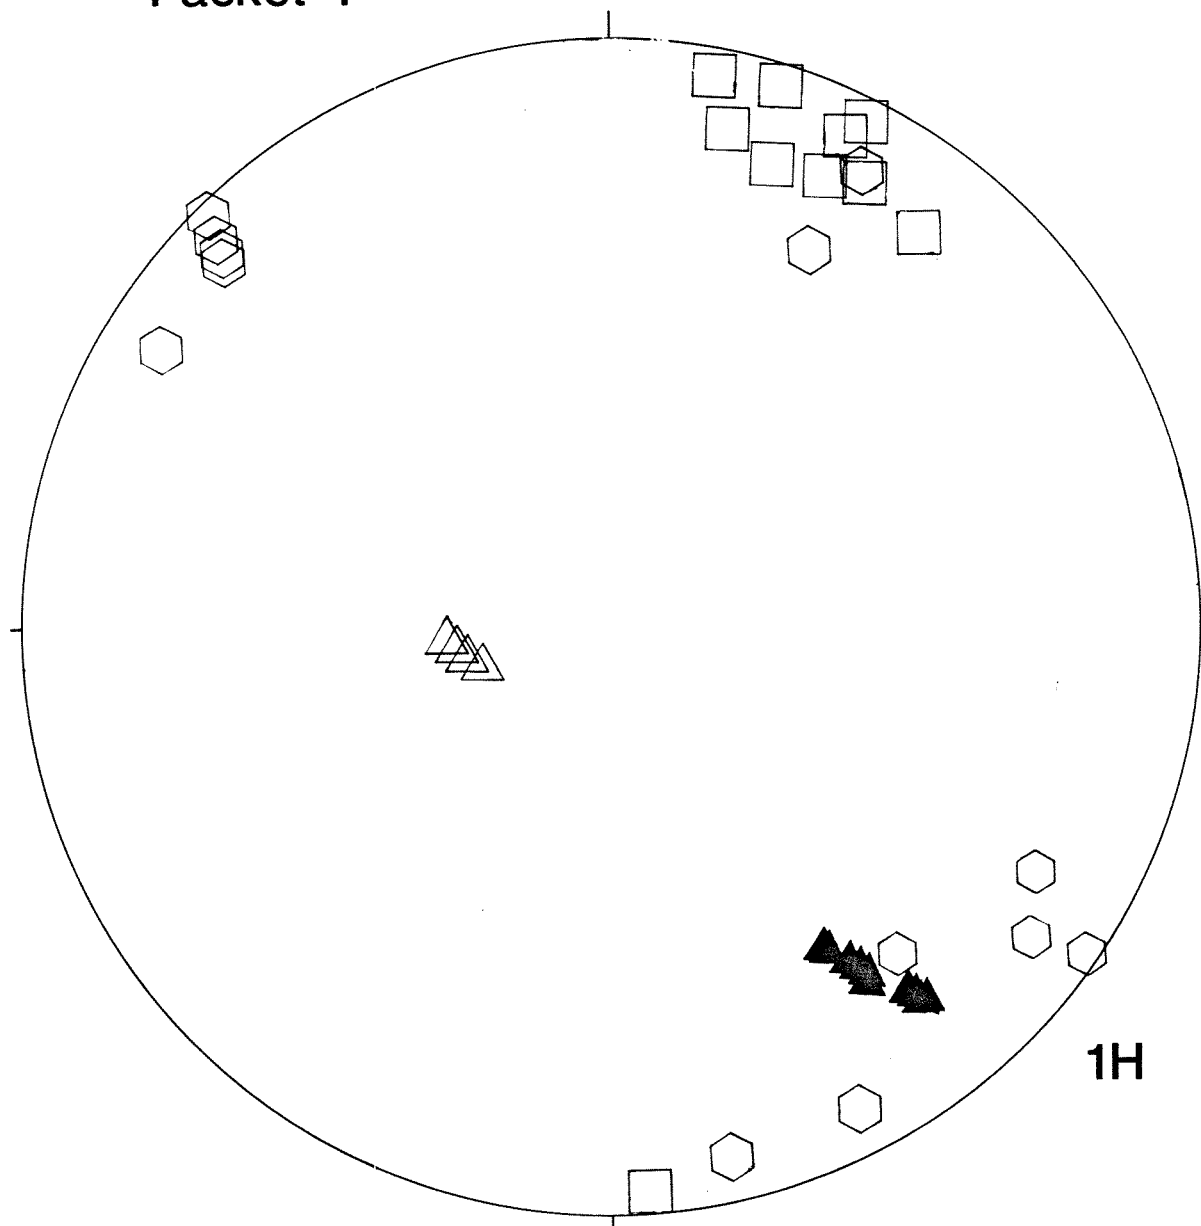

Packet 5

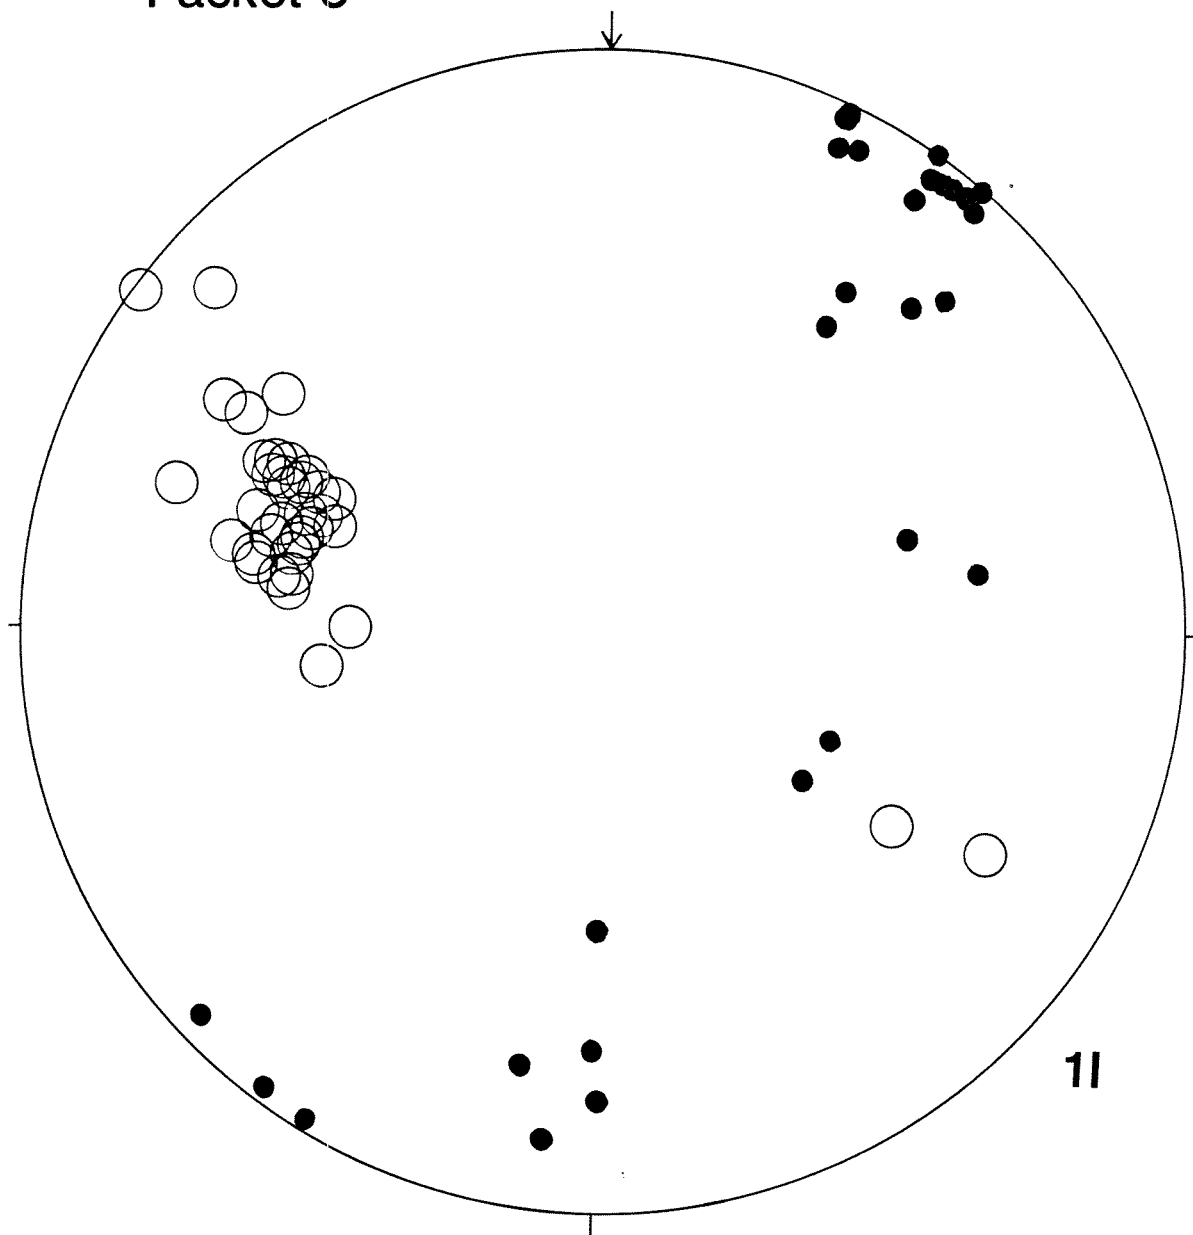

Packet 5

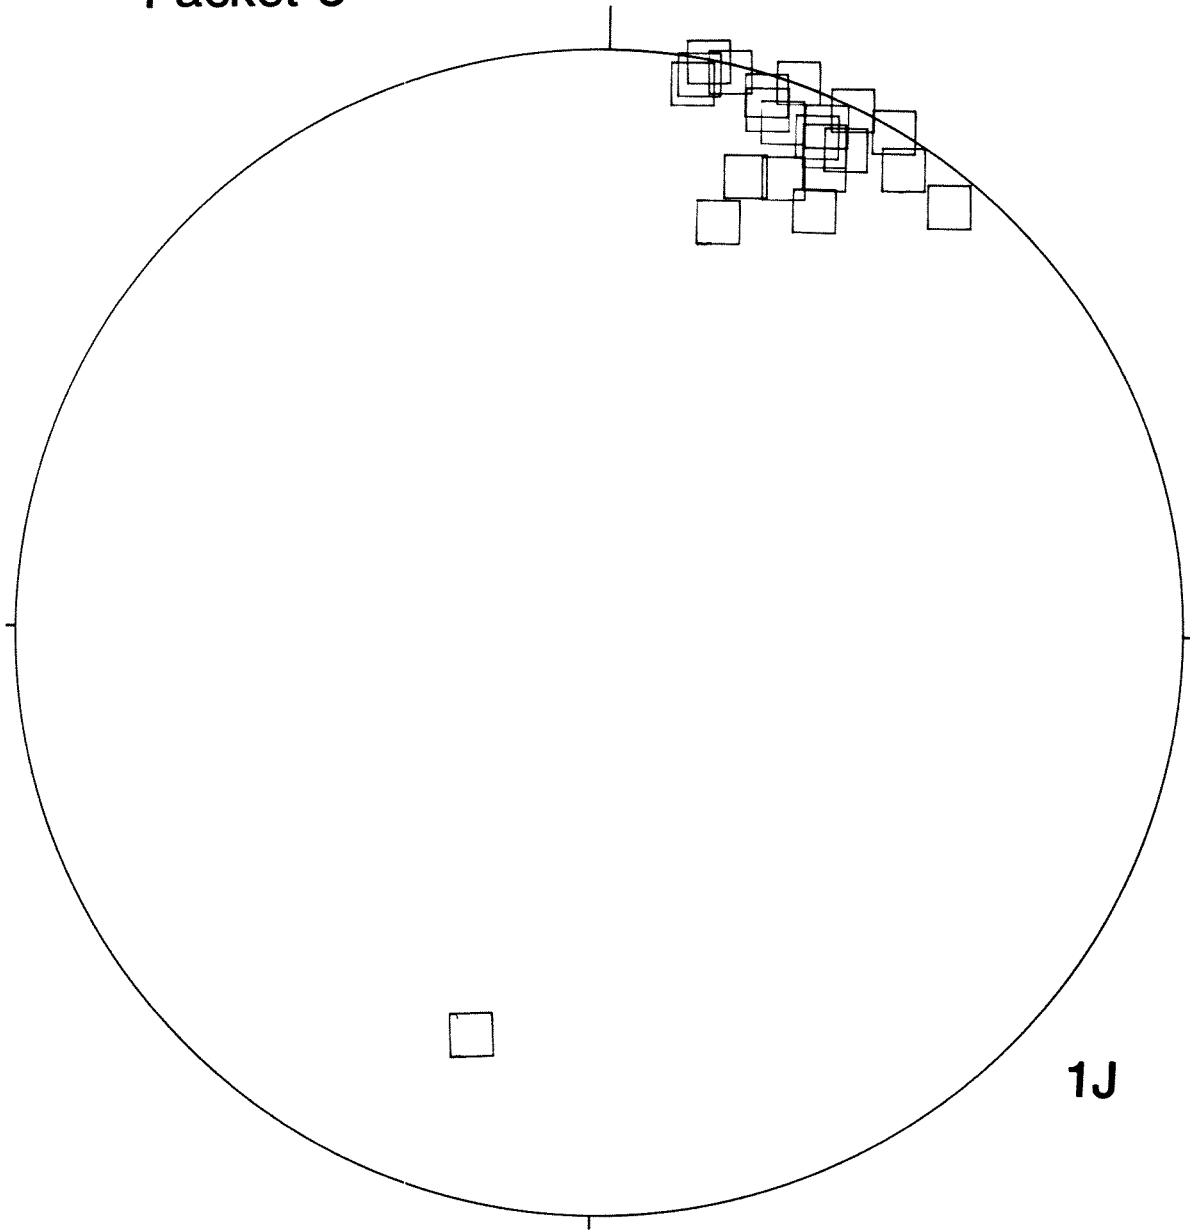

1J

Packet 6

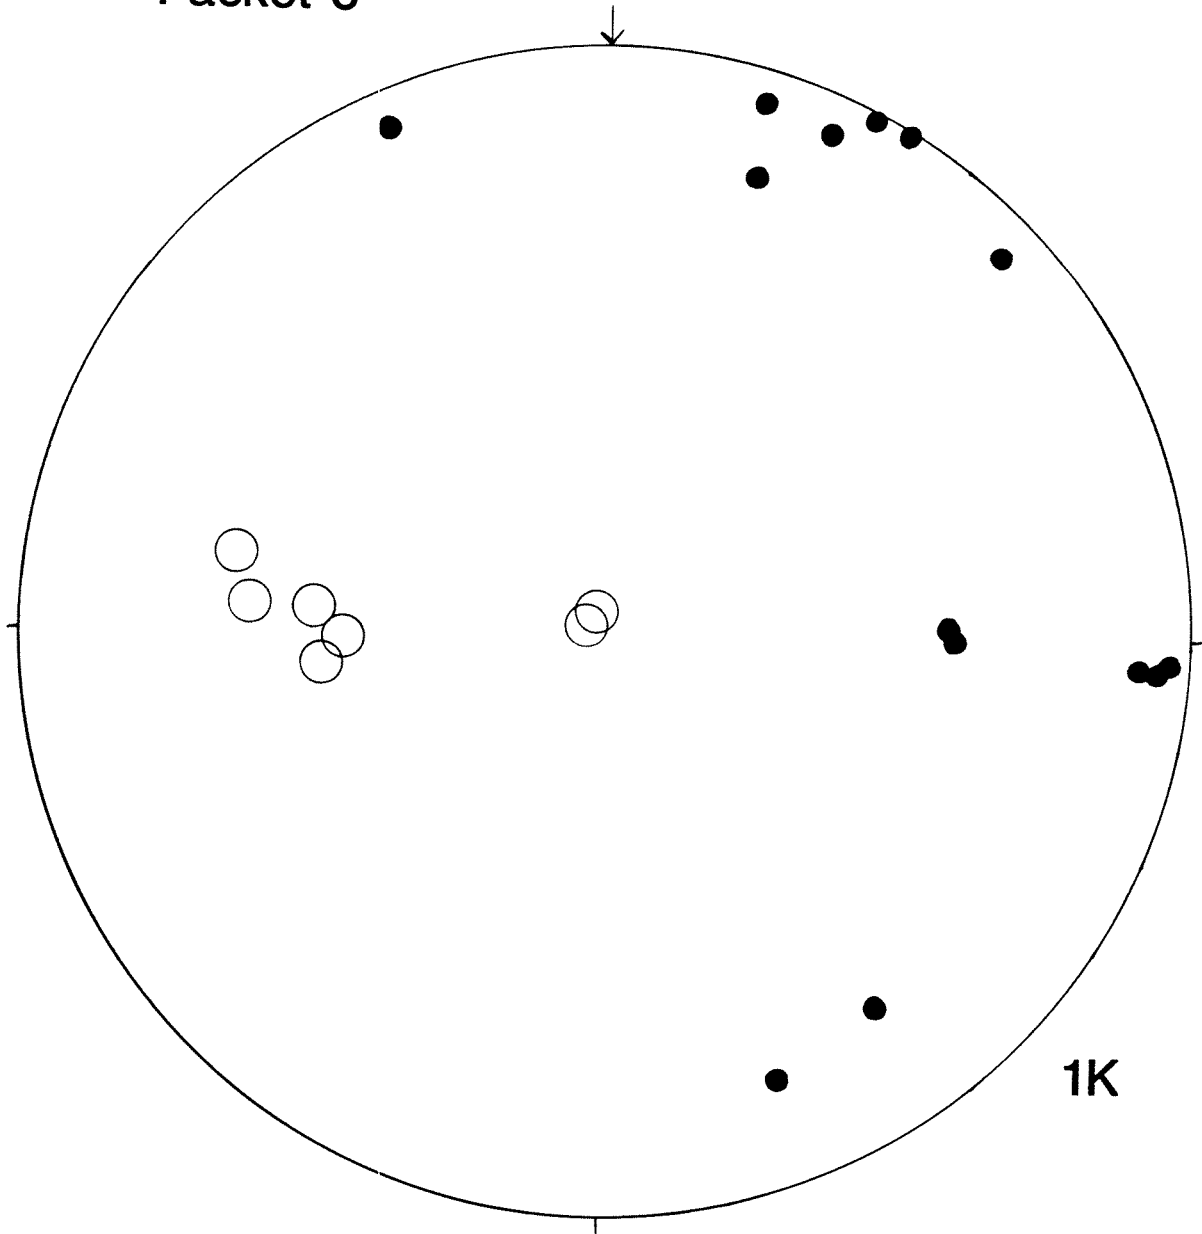

Packet 6

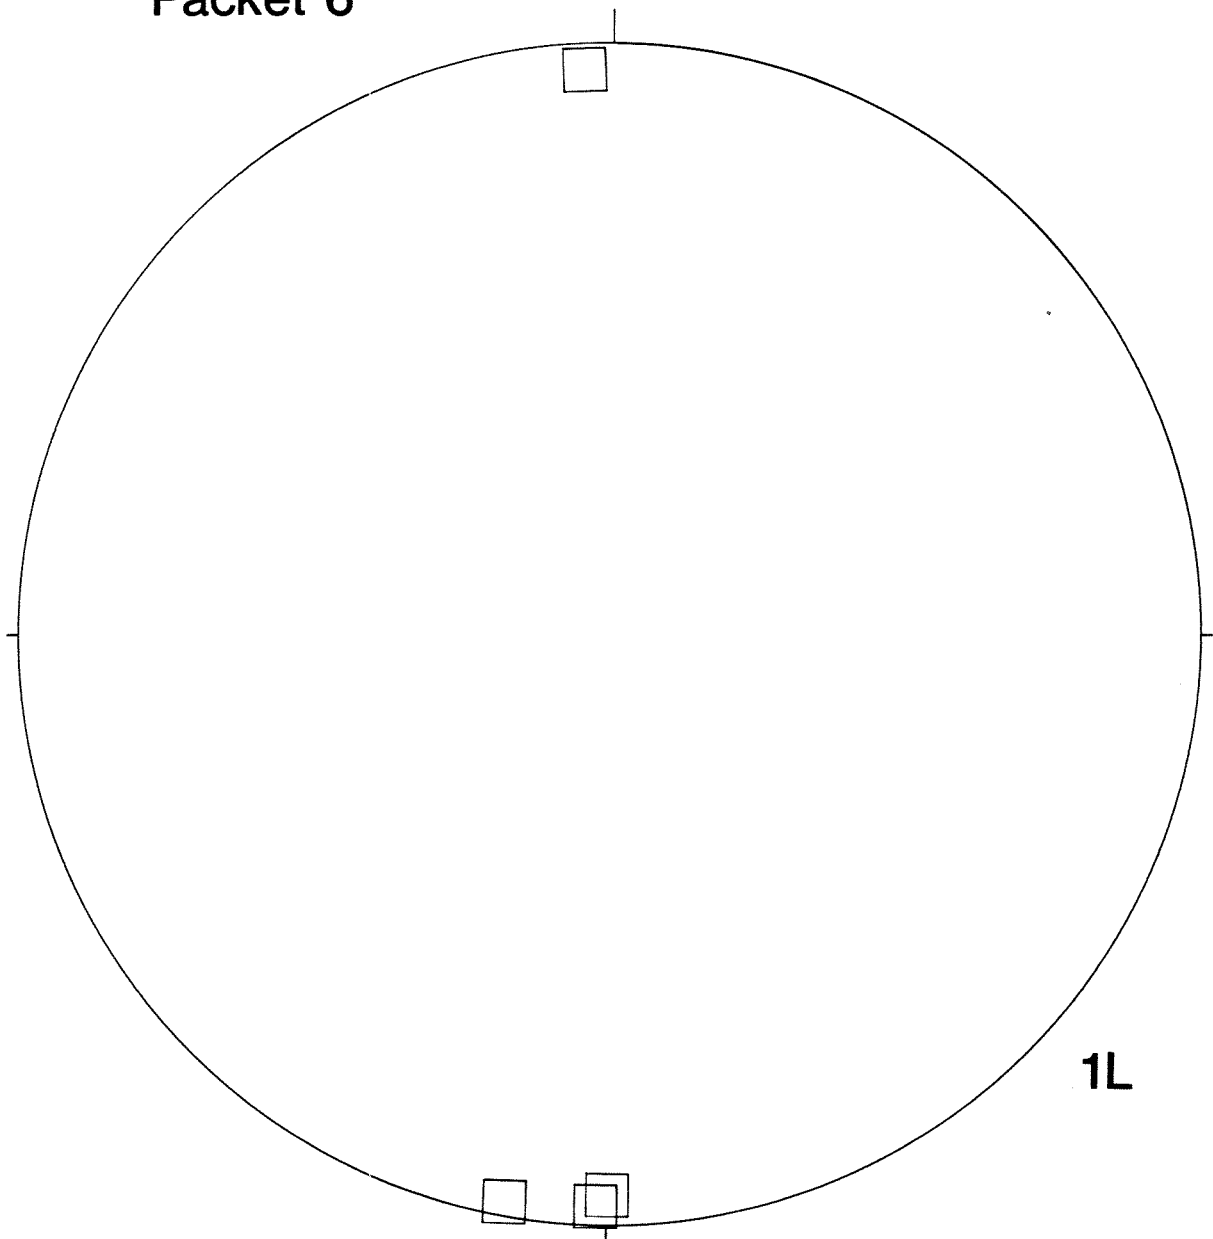



Packet 7

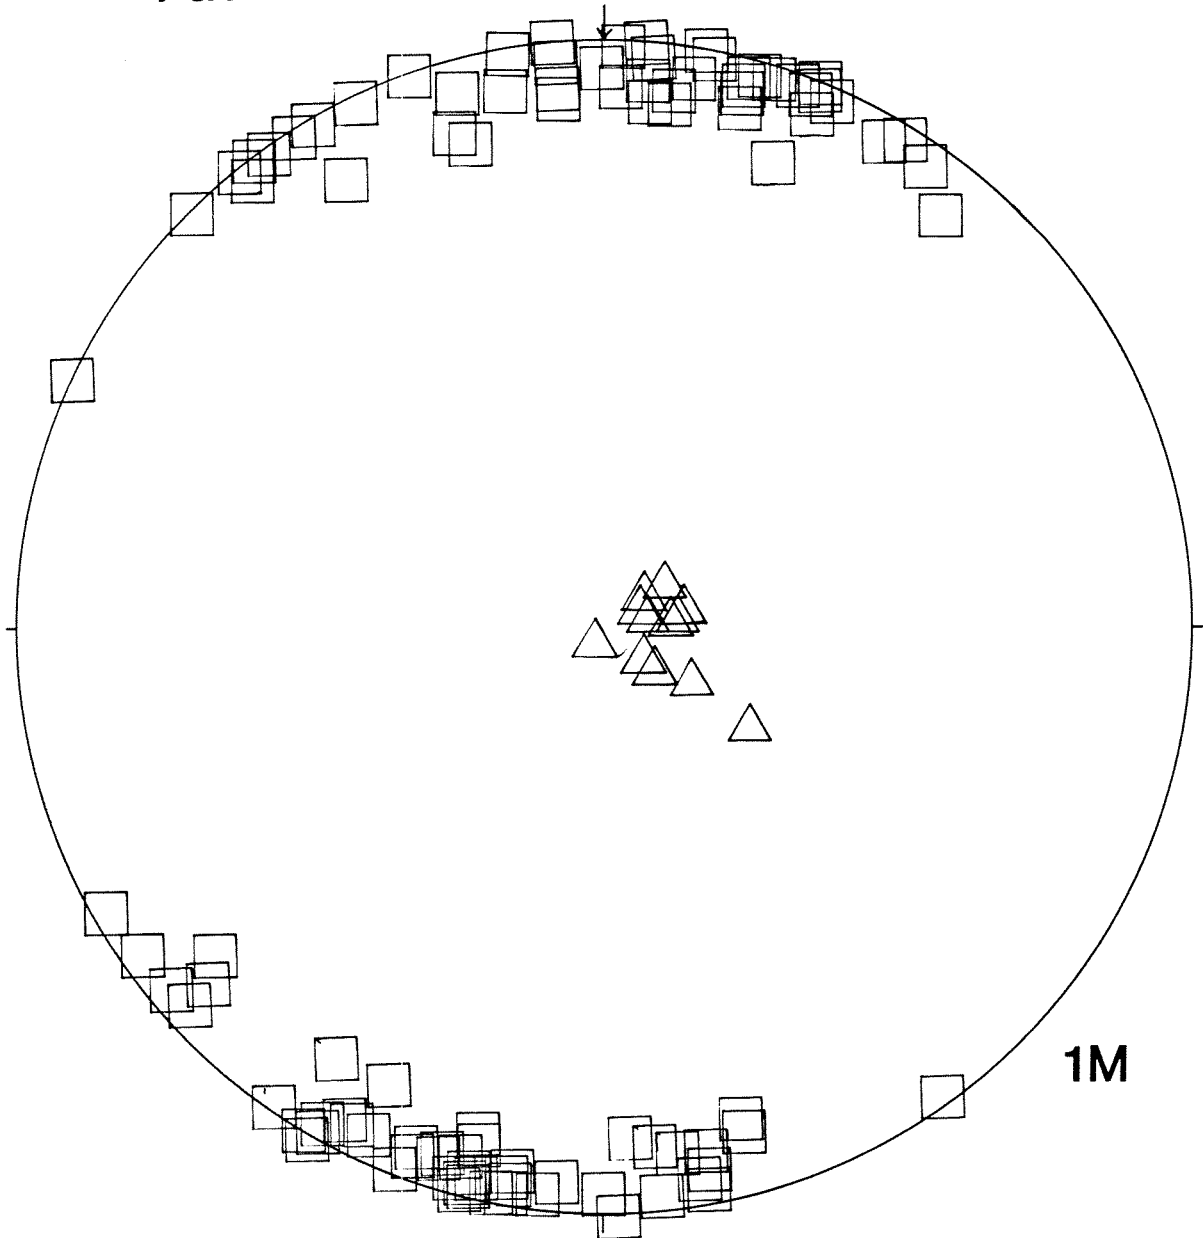

Packet 7

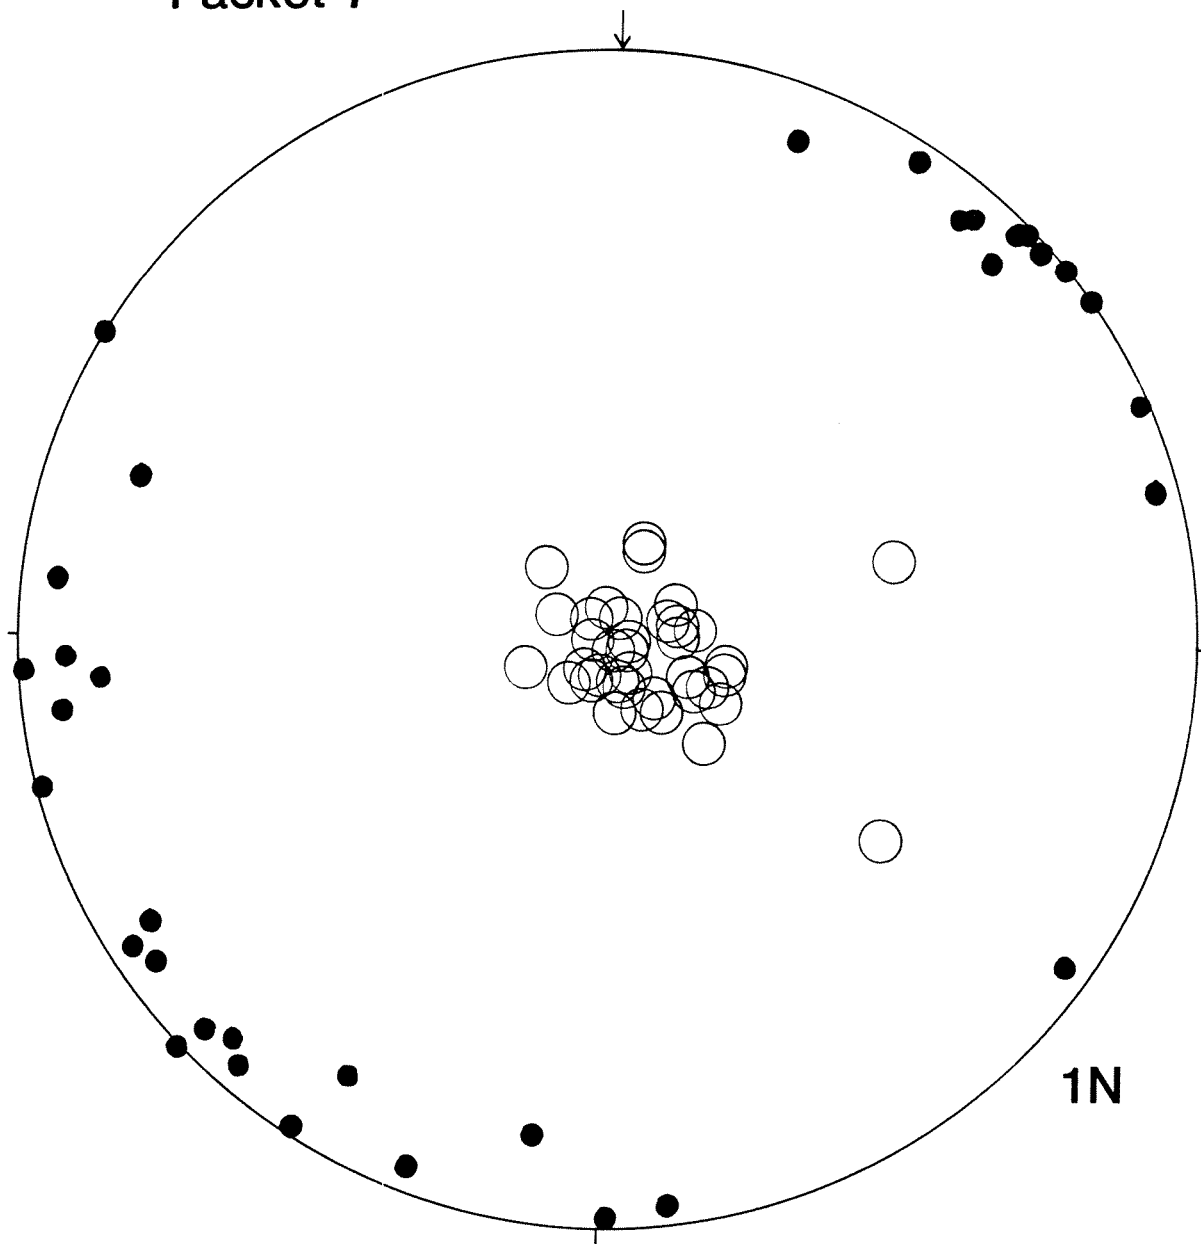

Packet 7

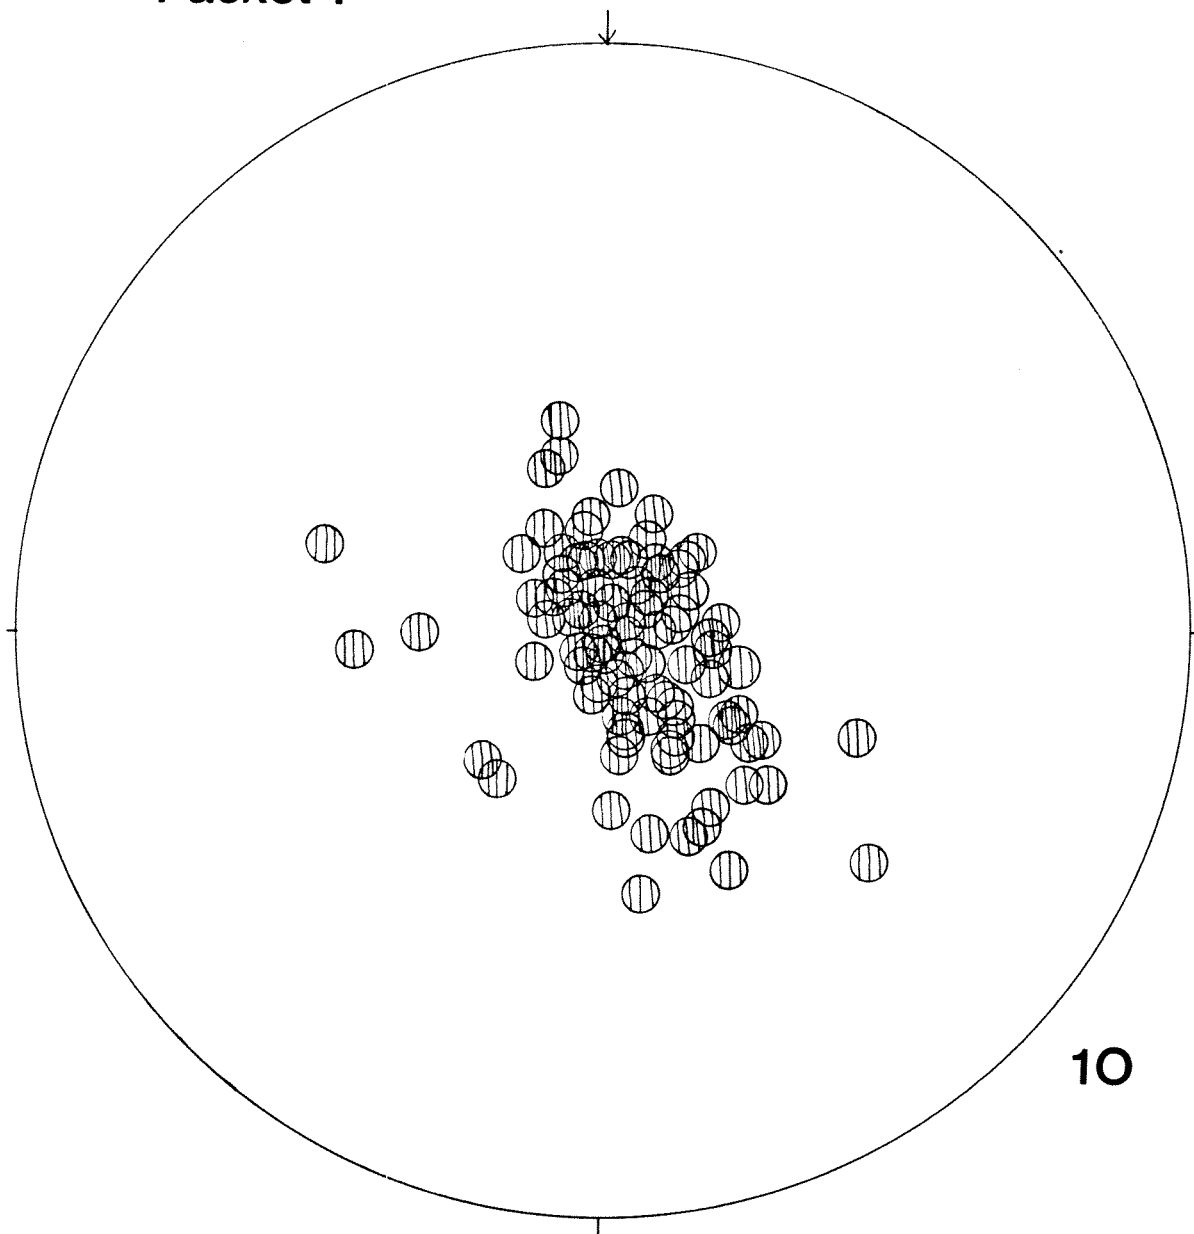

Packet 7A

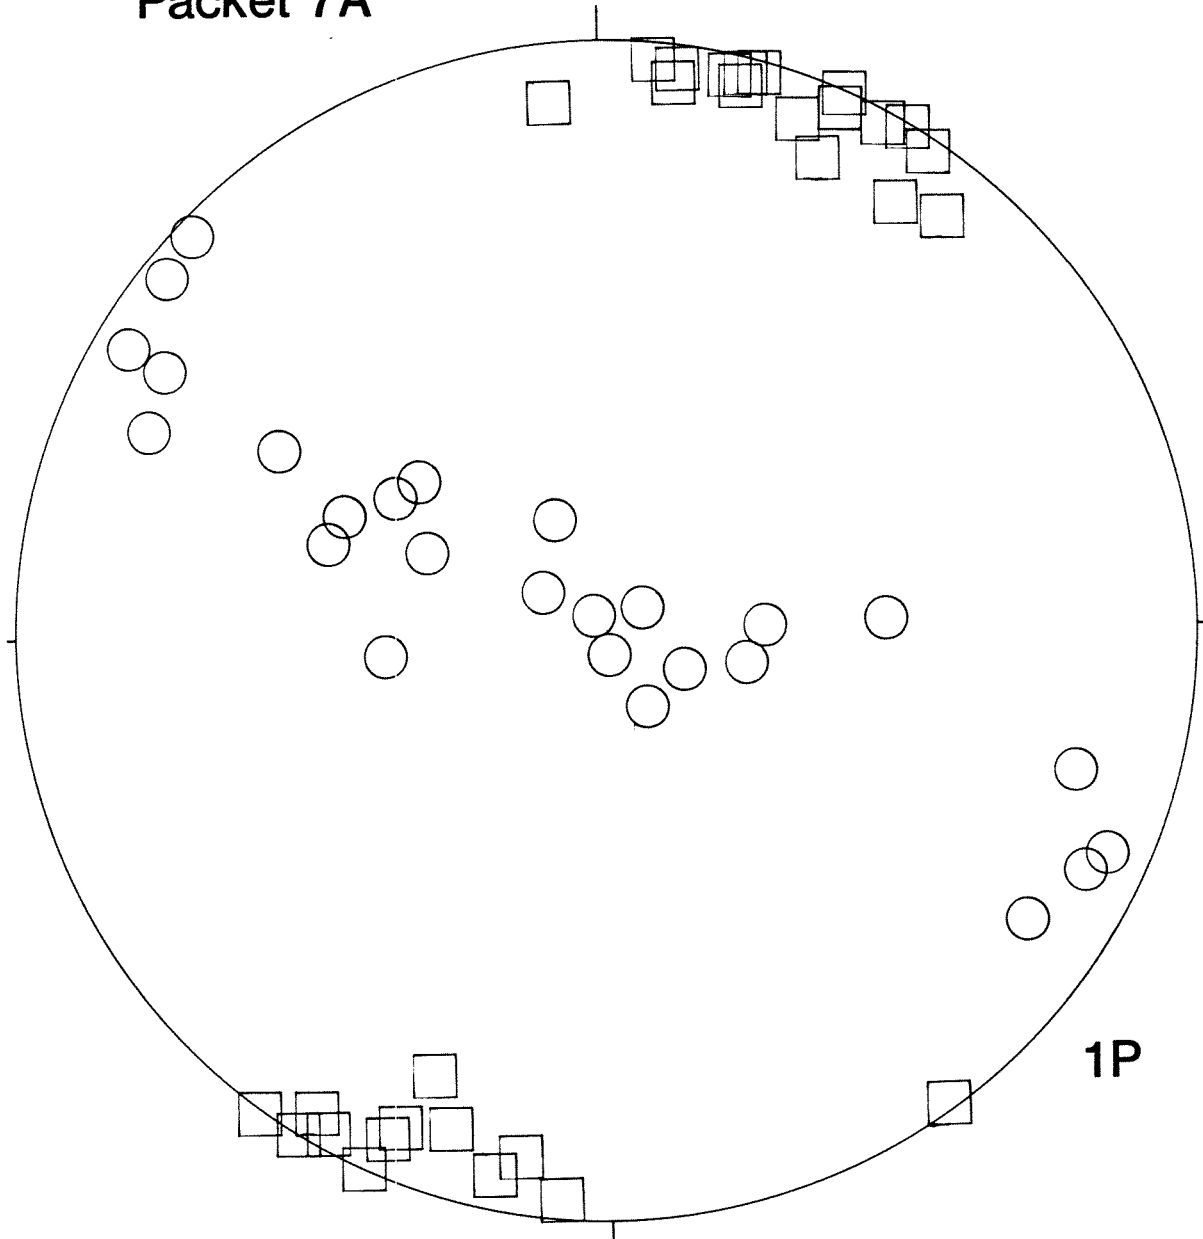

Packet 8

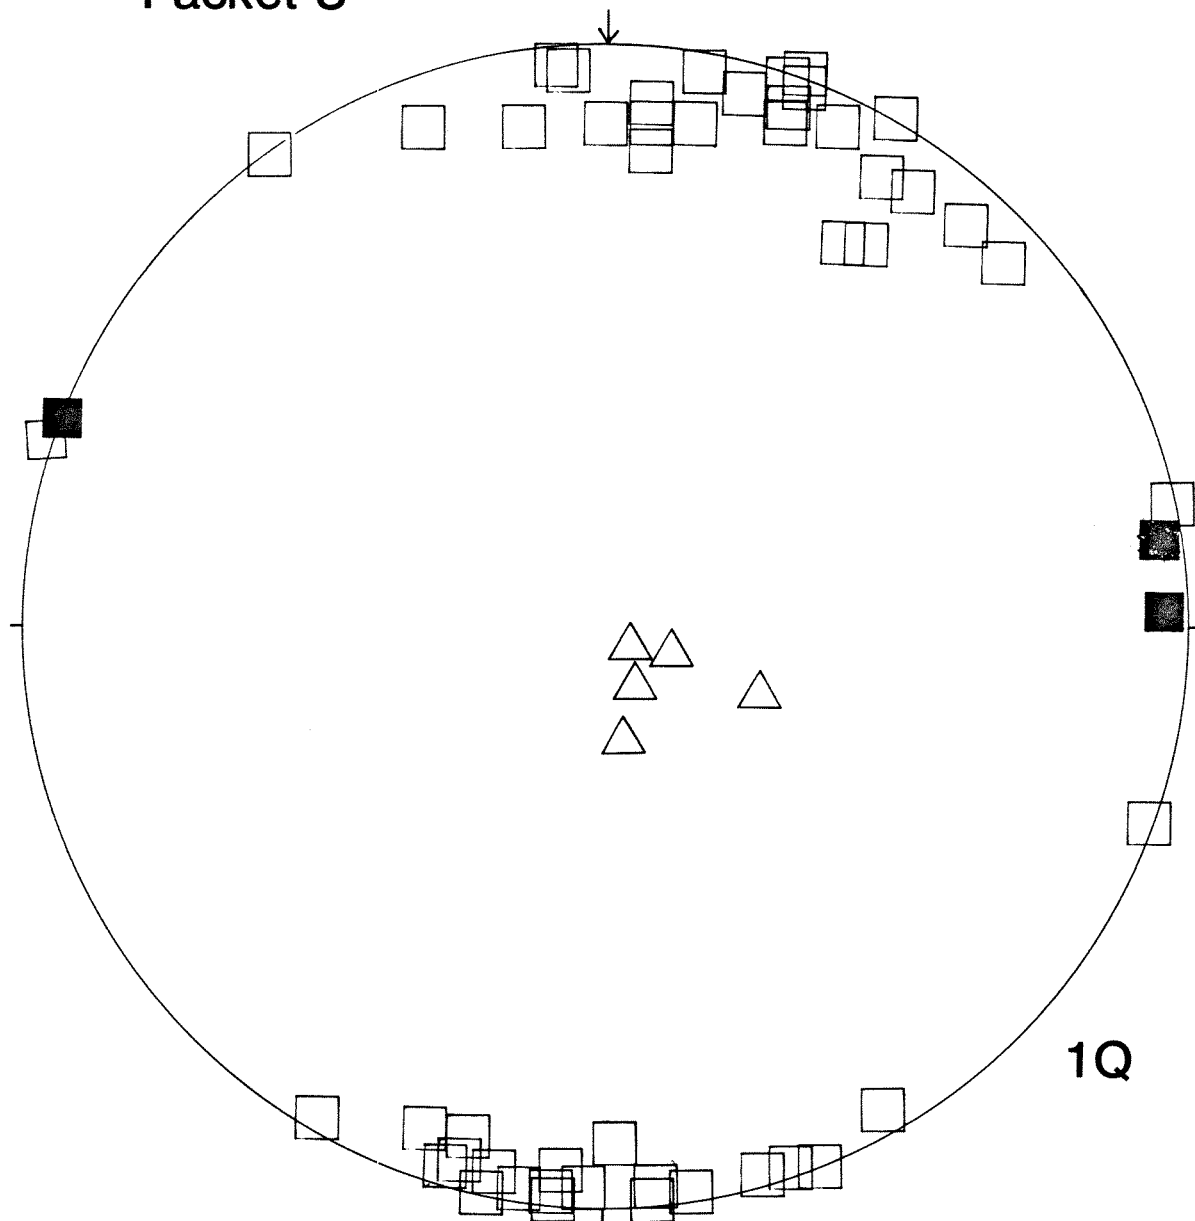

Packet 8

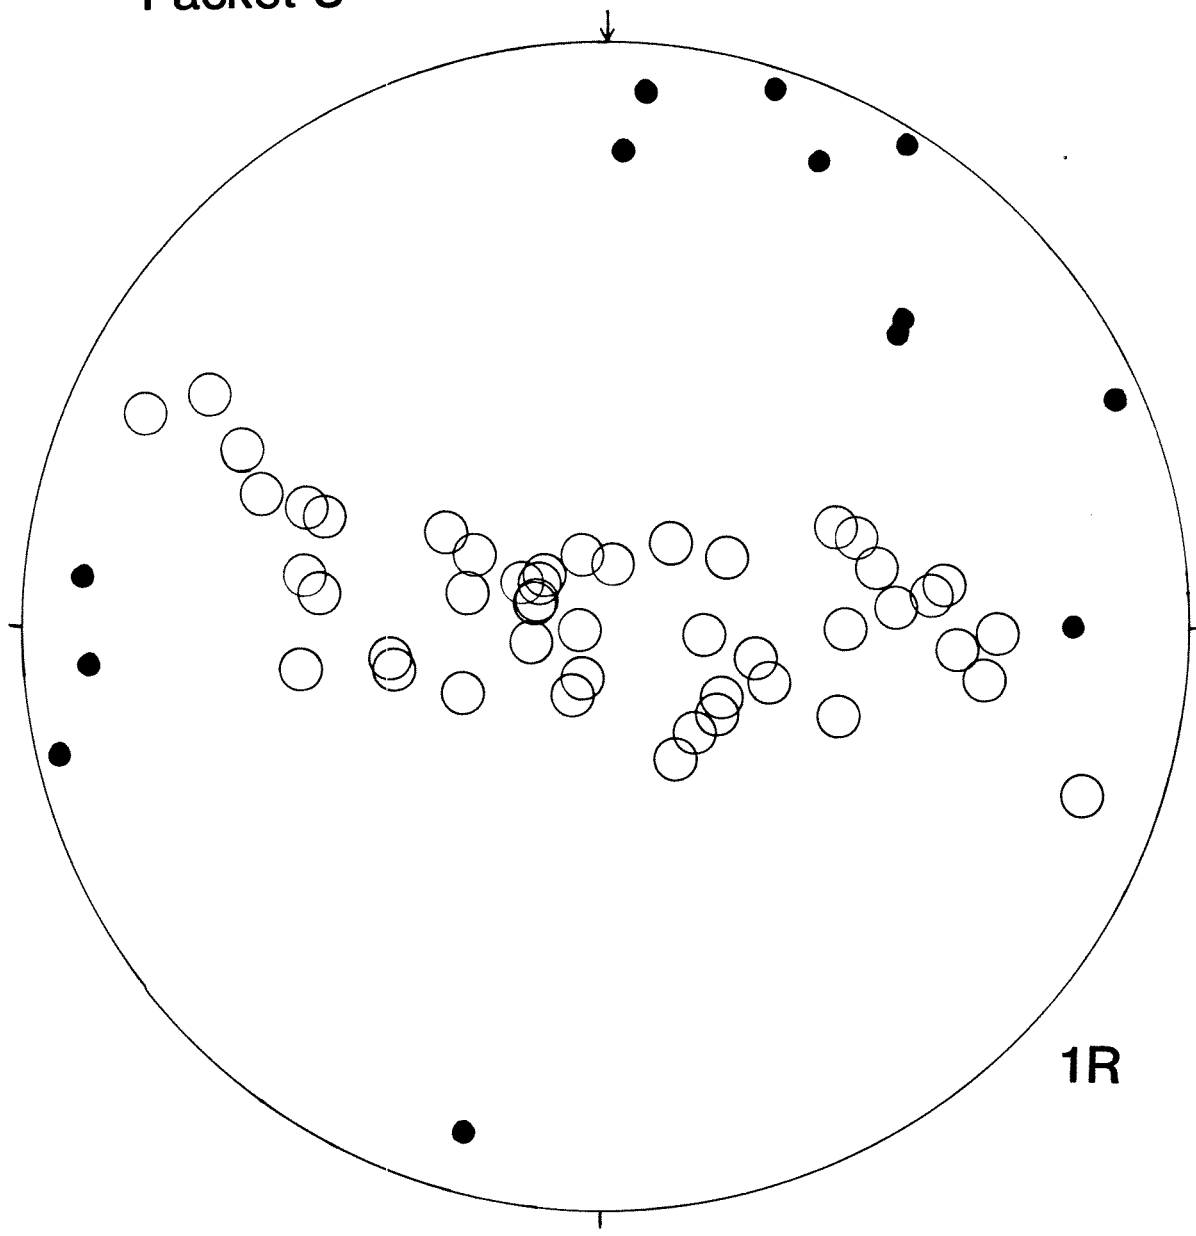

2.

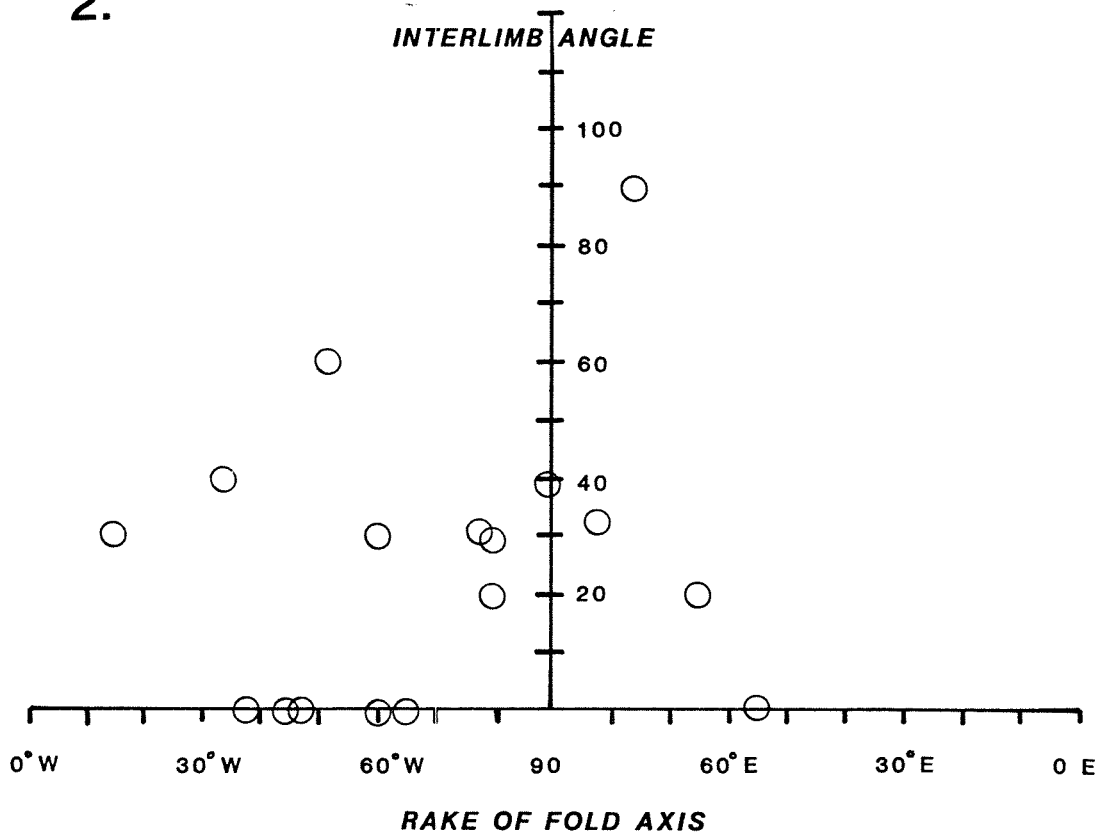

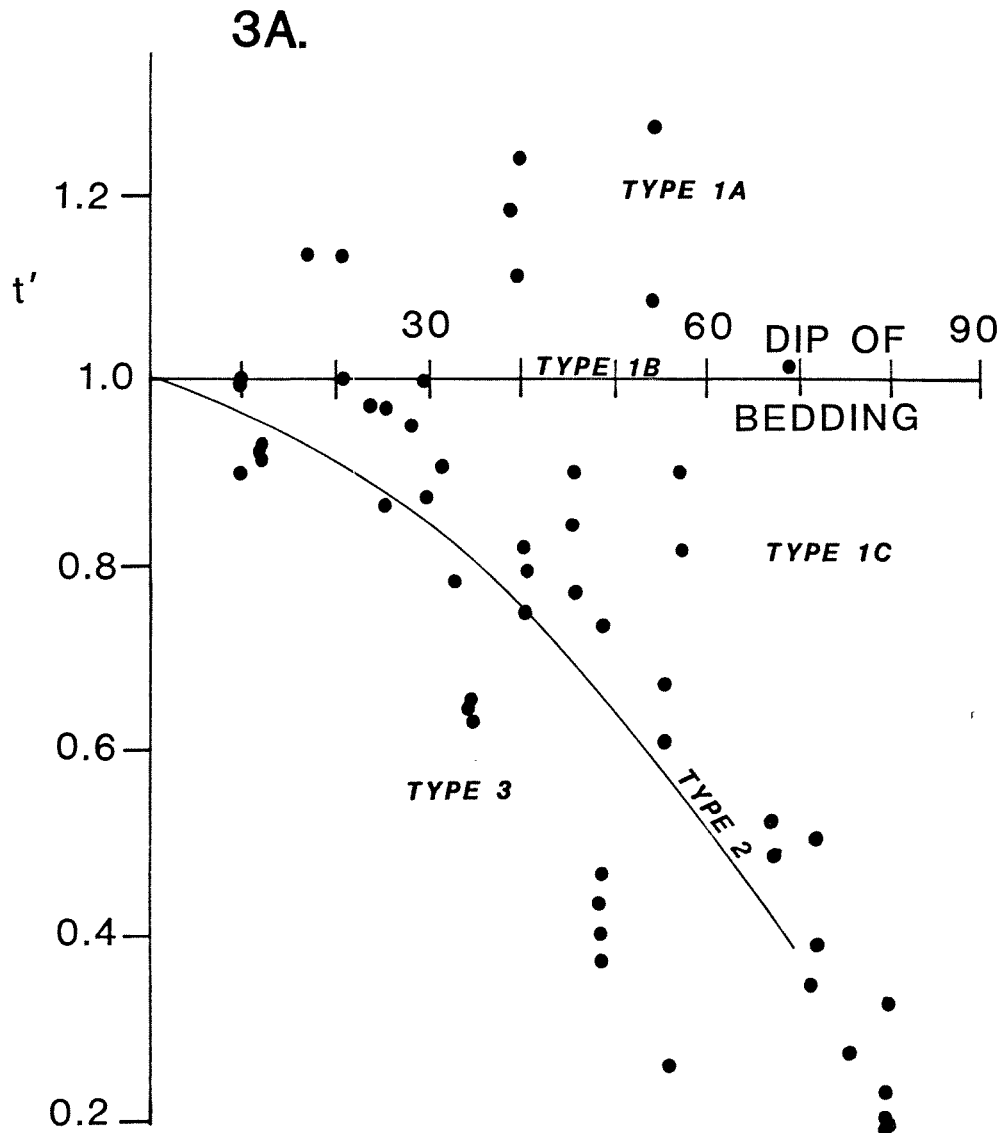



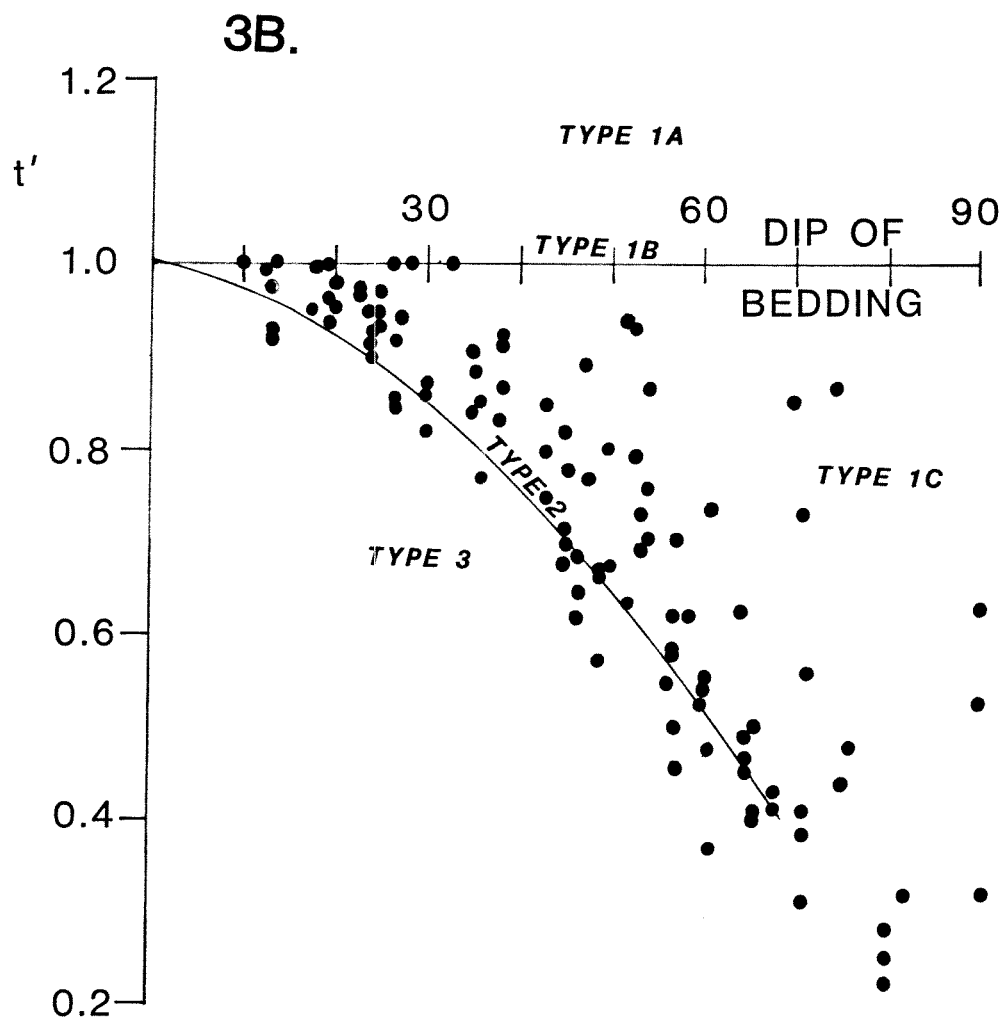

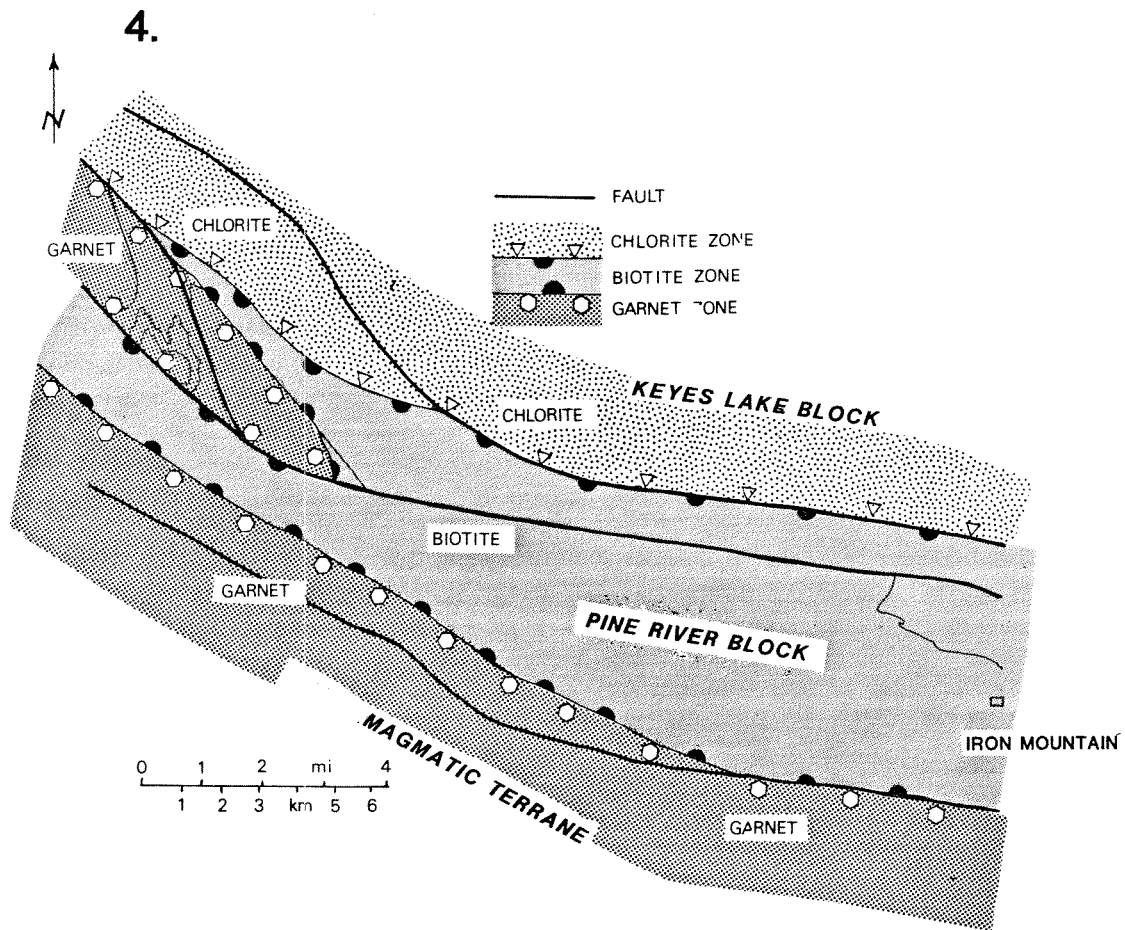

Supplement: Supplementary file 1 [file 22739810]
